# Supplementary material for: Long non-coding RNA Malat1 fine-tunes bone homeostasis and repair by orchestrating cellular crosstalk and β-catenin-OPG/Jagged1 pathway
Source: eLife journal article supplement (doi:10.7554/elife.98900), 2024-07-01

Figure 5-Source Data 2. Original membranes corresponding to Figure 5 panel H

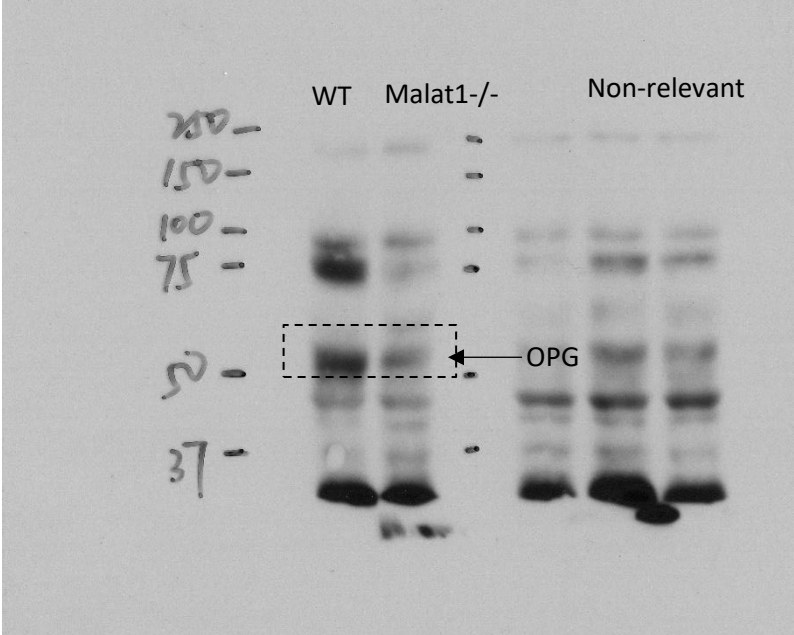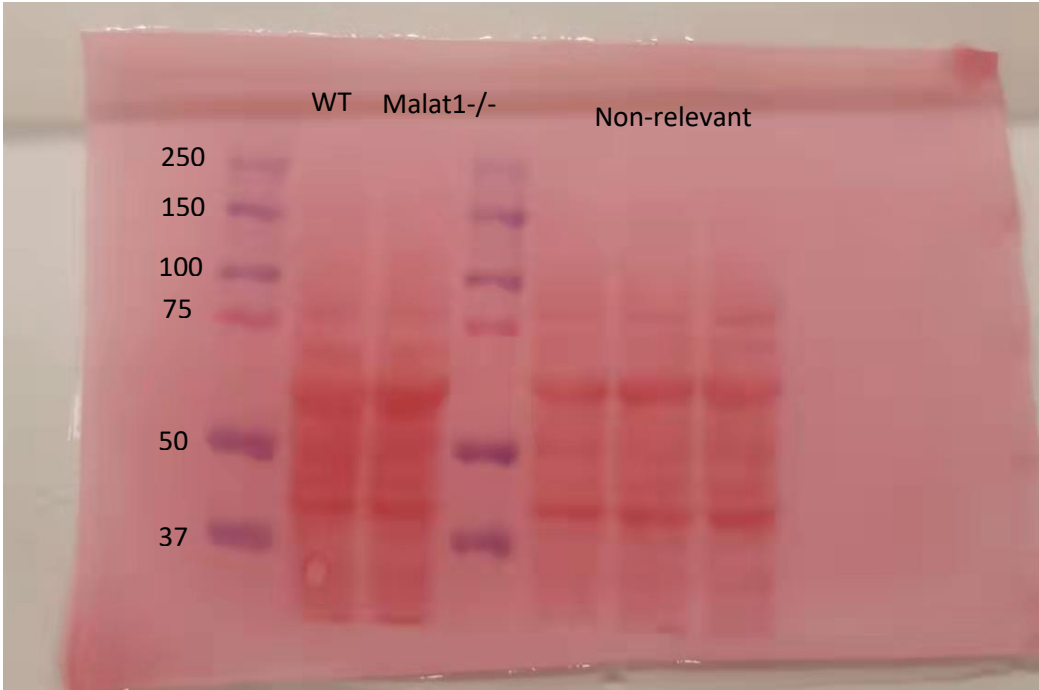

Supplement: fig5-data2 [file elife-98900-fig5-data2-v1.pdf]
