# Supplementary material for: Long non-coding RNA Malat1 fine-tunes bone homeostasis and repair by orchestrating cellular crosstalk and β-catenin-OPG/Jagged1 pathway
Source: eLife journal article supplement (doi:10.7554/elife.98900), 2024-07-01

Figure 6-Source Data 2. Original membranes corresponding to Figure 6 panel G and I

Figure 6G

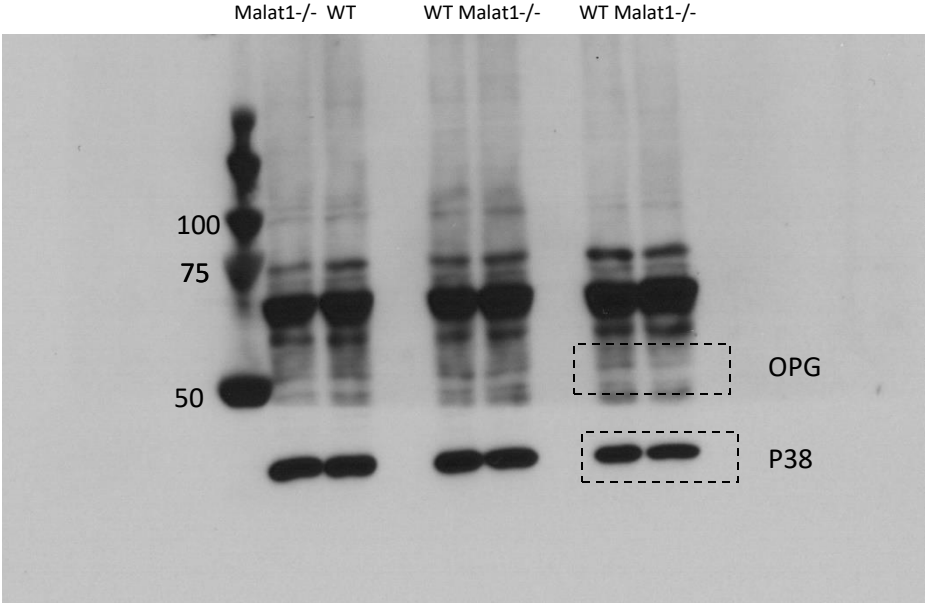

Figure 6I

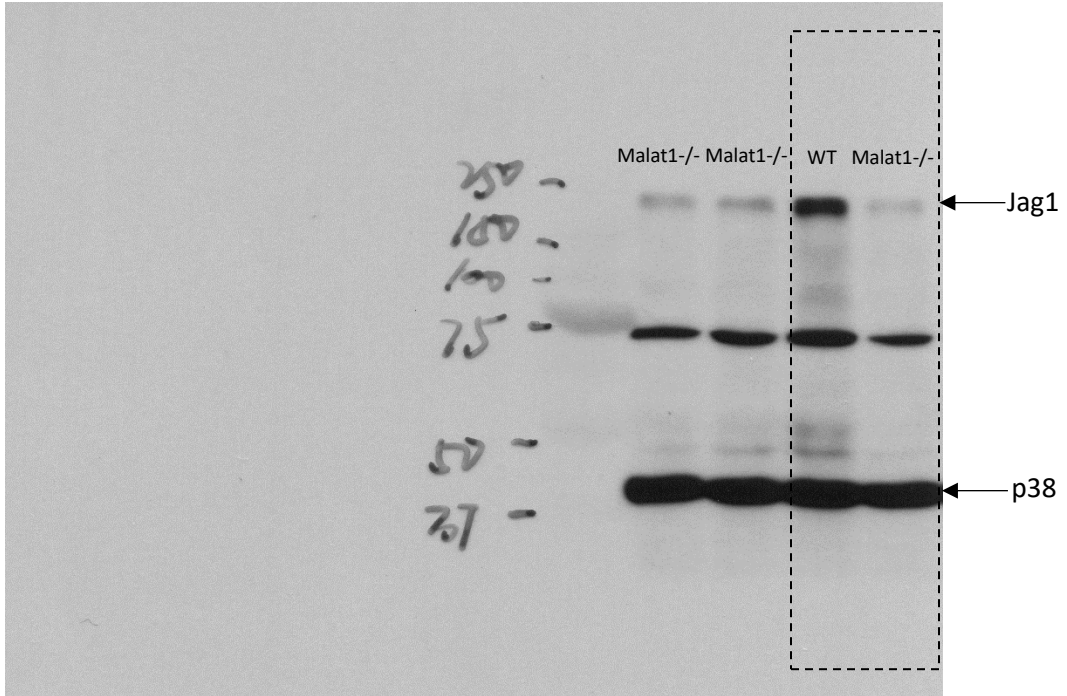

Supplement: fig6-data2 [file elife-98900-fig6-data2-v1.pdf]
