# Supplementary material for: Long non-coding RNA Malat1 fine-tunes bone homeostasis and repair by orchestrating cellular crosstalk and β-catenin-OPG/Jagged1 pathway
Source: eLife. 2024 Dec 23;13:RP98900. doi: 10.7554/eLife.98900 (PMC11666238; doi:10.7554/eLife.98900)
Supplement: Figure 1—figure supplement 1—source data 1. [file elife-98900-fig1-figsupp1-data1.xlsx]

## Sheet: Supplemetary Fig.1a
WT	Malat1-/-
29.5	25.5
28	28.89
28.73	28.28
28.75	27
27.38	25.05
23.11	22.48

## Sheet: Supplementary Fig.1b
Ct.BV/TV			Ct.Th
WT	Malat1-/-		WT	Malat1-/-
92.28	92.67		0.1708	0.1705
93.59	91.92		0.1793	0.1546
93.62	93.84		0.2003	0.2073
93.45	93.74		0.1865	0.196
94.53	94.1		0.2479	0.2087
94.03	93.57		0.2257	0.1982
