# Supplementary material for: Long non-coding RNA Malat1 fine-tunes bone homeostasis and repair by orchestrating cellular crosstalk and β-catenin-OPG/Jagged1 pathway
Source: eLife. 2024 Dec 23;13:RP98900. doi: 10.7554/eLife.98900 (PMC11666238; doi:10.7554/eLife.98900)
Supplement: Figure 1—source data 1. [file elife-98900-fig1-data1.xlsx]

## Sheet: Fig.1b
Male
BV/TV			Tb.N			Tb.Th			Tb.Sp			Conn.-Des			BMD
WT	Malat1-/-		WT	Malat1-/-		WT	Malat1-/-		WT	Malat1-/-		WT	Malat1-/-		WT	Malat1-/-
12.19	11.63		5.3822	4.9258		0.0357	0.0393		0.1788	0.197		240.995	206.357		107.589	104.385
10.21	8.44		5.3279	4.6058		0.0332	0.0369		0.1846	0.2145		253.352	164.178		92.6779	75.543
14.81	9.7		5.4285	4.4468		0.0467	0.033		0.1801	0.2261		260.476	204.809		134.927	88.4269
15.09	12.9		5.2758	4.8941		0.0448	0.0411		0.1829	0.2008		255.318	200.73		142.905	117.138
9.73	7.72		4.8237	4.2339		0.0381	0.0336		0.2041	0.2336		289.548	278.312		84.1759	62.6591
17.47	13.71		5.3741	5.3299		0.0451	0.0407		0.1773	0.1785		231.234	194.064		163.637	122.043
8.81	8.22		4.6829	4.7787		0.035	0.0348		0.2092	0.2051		180.072	151.66		80.5135	71.0958
13.51	6.57		4.6718	4.3331		0.0458	0.0321		0.2074	0.2262		169.932	136.129		124.397	55.2035
13.09	11.34		4.6061	4.4919		0.0467	0.047		0.2151	0.2234		189.821	42.3536		141.859	120.473
16.98	5.44		4.8393	3.5248		0.0457	0.0411		0.1972	0.2855		188.851	59.2698		179.791	53.1761
15.04	6.57		4.7908	4.0106		0.0461	0.0373		0.2001	0.243					156.116	71.7498
Female
BV/TV			Tb.N			Tb.Th			Tb.Sp			Conn.-Dens			BMD
WT	Malat1-/-		WT	Malat1-/-		WT	Malat1-/-		WT	Malat1-/-		WT	Malat1-/-		WT	Malat1-/-
7.35	5.74		3.98	3.9395		0.0388	0.0369		0.2514	0.255		150.554	112.935		59.5199	38.0032
6.01	5.8		4.0319	3.8336		0.0398	0.0348		0.2489	0.2602		236.499	195.763		48.9905	43.5622
9.81	6.55		4.3216	3.936		0.042	0.0393		0.2298	0.2518		201.662	137.205		84.3721	53.3723
10.17	6.53		4.5314	3.8397		0.0383	0.0421		0.2176	0.2612		234.227	116.315		88.2961	52.9799
10.71	8.51		4.7788	4.2527		0.0405	0.0365		0.2073	0.2046		257.603	198.589		91.4353	77.3088
9.51	7.69		4.4756	4.3011		0.0382	0.0381		0.2221	0.2312		202.415	159.067		83.3257	61.7435
7.69	8.67		4.2815	4.1019		0.0359	0.0439		0.2332	0.2427		195.568	162.266		59.1275	74.235
9.1	5.13		4.7092	3.5607		0.0358	0.0369		0.2086	0.2825		239.509	94.909		82.2139	30.613
9.4	6.05		4.4037	4.2977		0.0405	0.0322		0.2239	0.2314		197.391	123.299		83.3911	48.2711

## Sheet: Fig.1d
Oc.S/BS			N.Oc./B.Pm
WT	Malat1-/-		WT	Malat1-/-
3.5616	8.91675		2.58265	5.32
3.49735	10.5929		2.3217	5.7956
5.02505	5.82035		2.67125	3.6043
5.0941	8.0012		2.46875	3.96735
3.69105	6.3945		2.02915	3.3644
3.4222	7.59945		1.9244	3.9788
2.4967	3.7674		1.23575	1.70545
5.49	10.5		2.83	4.08

## Sheet: Fig.1f
BFR/BS			MAR
WT	Malat1-/-		WT	Malat1-/-
0.38855	0.22905		2.04115	1.7251
0.497	0.2371		2.30225	1.96465
0.43765	0.27765		1.9679	1.5654
0.34735	0.3034		2.09055	1.8246
0.32915	0.21985		1.67705	1.76015
0.6441	0.40335		1.90425	1.7166
0.6858	0.4026		2.1062	1.9296
0.45105	0.31605		2.56715	1.55035

## Sheet: Fig.1h
N.Ob/B.Pm			Ob.S/BS			Osteoid
WT	Malat1-/-		WT	Malat1-/-		WT	Malat1-/-
9.8536	7.749		9.63065	5.75705		3.6287	1.71795
7.71545	4.8983		6.18405	4.14455		3.85205	1.3041
10.0534	7.3528		6.5455	5.34625		2.3814	1.54625
8.49335	4.82665		9.84125	5.8367		5.88835	0.90335
4.2797	2.68995		4.221	2.9178		2.8349	2.7769
8.49855	6.06925		8.5378	6.22785		2.1439	1.06825
10.5836	6.61675		8.90765	6.63315		2.08205	0.8985
11.1211	7.1352		9.8148	7.44035		4.23155	1.0357
11.223	9.2911		9.2824	7.039		4.73305	2.5159
9.2231	6.8463		9.3874	7.5093		3.97775	1.8376

## Sheet: Fig.1i
TRAP
WT	Malat1-/-
4.26618	5.00578
3.87034	4.49853
4.15206	6.41913
4.45369	5.16862
4.02742	4.18187
4.86181	4.91773
4.53495	4.62253
4.87577	5.11612
P1NP
WT	Malat1-/-
568.833	642.357
428.88	300.222
831.843	446.505
686.799	481.341
744.72	229.248
802.14	501.024
