# Supplementary material for: Long non-coding RNA Malat1 fine-tunes bone homeostasis and repair by orchestrating cellular crosstalk and β-catenin-OPG/Jagged1 pathway
Source: eLife. 2024 Dec 23;13:RP98900. doi: 10.7554/eLife.98900 (PMC11666238; doi:10.7554/eLife.98900)
Supplement: Figure 2—figure supplement 1—source data 1. [file elife-98900-fig2-figsupp1-data1.xlsx]

## Sheet: Supplementary Fig.2a
Malat1f/f	Malat1ΔOcn
30.15	29.7
27.88	29.23
25.68	26.45
22.52	25.36
23.23	23.57

## Sheet: Supplementary Fig.2b
Ct.BV/TV			Ct.Th
Malat1f/f	Malat1ΔOcn		Malat1f/f	Malat1ΔOcn
92.74	91.99		0.189	0.186
92.28	92.15		0.198	0.188
91.78	91.5		0.204	0.192
92.79	91.65		0.169	0.168
90.89	92.65		0.175	0.15
