# Supplementary material for: Long non-coding RNA Malat1 fine-tunes bone homeostasis and repair by orchestrating cellular crosstalk and β-catenin-OPG/Jagged1 pathway
Source: eLife. 2024 Dec 23;13:RP98900. doi: 10.7554/eLife.98900 (PMC11666238; doi:10.7554/eLife.98900)
Supplement: Figure 2—source data 1. [file elife-98900-fig2-data1.xlsx]

## Sheet: Fig.2b
BV/TV			Tb.N			Tb.Th			Tb.Sp			Conn.-Dens			BMD
Malat1f/f	Malat1ΔOcn		Malat1f/f	Malat1ΔOcn		Malat1f/f	Malat1ΔOcn		Malat1f/f	Malat1ΔOcn		Malat1f/f	Malat1ΔOcn		Malat1f/f	Malat1ΔOcn
15.95	12.95		5.3528	5.4375		0.0409	0.0378		0.1797	0.1764		285.67	281.494		145.587	114.129
22.3	17.55		6.5906	5.8555		0.0439	0.0413		0.1424	0.1627		424.231	357.473		210.595	161.414
17.13	15.13		5.917	5.3683		0.0414	0.0424		0.1581	0.1771		328.025	282.246		157.424	141.532
22.11	14.17		6.4534	5.3391		0.044	0.0426		0.1449	0.1791		395.559	263.628		208.764	129.237
15.31	15.51		5.6536	5.7489		0.0386	0.04		0.1673	0.1678		316.179	291.834		152.192	163.637
15.53	13.83		5.7876	5.5319		0.0395	0.0409		0.1644	0.1719		335.057	289.796		153.173	130.087
12.27	9.67		5.2081	4.8652		0.0394	0.0347		0.1862	0.1999		247.232	239.439		110.598	80.5135
13.75	14.02		5.7231	5.4039		0.0371	0.0409		0.1654	0.1768		313.01	273.862		125.313	129.106
16.47	9.84		5.3778	5.2106		0.0413	0.0328		0.1746	0.1845		244.124	258.775		157.882	96.0788
14.52	12.26		5.2116	5.0172		0.0405	0.0374		0.18	0.1902		241.266	235.398		136.496	115.176
15.08	15.17		4.8264	5.1108		0.0435	0.0385		0.1997	0.1865		190.033	212.49		155.855	147.81
14.21	13.21		4.5303	4.9847		0.0441	0.0404		0.2178	0.1948		173.572	195.606		139.439	122.631
15.11	7.84		4.9849	4.5047		0.0409	0.0379		0.1903	0.2195		211.825	132.765		141.467	70.0494
14.72	8.19		5.6078	4.6931		0.0383	0.0344		0.1691	0.2076		273.145	158.707		144.017	78.2899

## Sheet: Fig.2c
BFR/BS			MAR
Malat1f/f	Malat1ΔOcn		Malat1f/f	Malat1ΔOcn
0.5034	0.3461		1.7277	1.2929
0.4039	0.3694		1.6859	1.3553
0.5177	0.2883		1.7759	1.6599
0.7229	0.1437		2.1758	1.0381
0.4571	0.4065		1.6573	1.3003
0.3718	0.393		1.6377	1.4546
0.7291	0.5822		2.04	1.8708

## Sheet: Fig.2d
N.Ob/B.Pm			Ob.S/BS
Malat1f/f	Malat1ΔOcn		Malat1f/f	Malat1ΔOcn
12.6259	5.3714		12.215	6.353
7.6968	5.5058		9.3683	7.4456
7.1242	5.4583		8.0887	5.4042
9.1729	9.2751		9.0926	8.7199
10.1623	5.8742		12.2556	7.0673
9.4663			10.3834

## Sheet: Fig.2e
P1NP
Malat1f/f	Malat1ΔOcn
1501.28	374.502
980.218	507.244
634.14	890.744
873.744	349.766
1167.5	650.35
