# Supplementary material for: Long non-coding RNA Malat1 fine-tunes bone homeostasis and repair by orchestrating cellular crosstalk and β-catenin-OPG/Jagged1 pathway
Source: eLife. 2024 Dec 23;13:RP98900. doi: 10.7554/eLife.98900 (PMC11666238; doi:10.7554/eLife.98900)
Supplement: Figure 3—source data 1. [file elife-98900-fig3-data1.xlsx]

## Sheet: Fig.3a
GFP	Malat1
0.164267	14.5799
0.164332	14.9009
0.167816	14.8962

## Sheet: Fig.3c
	GAPDH			Malat1
IgG	0.800341	1.11964	1.08002	0.33049	2.31337	0.356135
Anti-b-catenin	0.687434	1.17834	0.791066	31.3882	39.9747	29.0743

## Sheet: Fig.3e
	WT					Malat1-/-
0h	1.11895	0.943721	0.929861	0.995382	1.01209	1.39259	1.0741	0.952313	1.55958	0.944179
16h	113.185	88.7381	110.963	97.0959	107.671	58.3971	66.4226	69.5572	71.0517	65.2631

## Sheet: Fig.3f
Axin2			Ccnd1			Lef1			Myc
WT	Malat1-/-		WT	Malat1-/-		WT	Malat1-/-		WT	Malat1-/-
0.273437	0.12668		14.2456	8.97861		0.048501	0.017062		5.63647	3.38078
0.28828	0.15437		14.3995	9.09262		0.058074	0.01582		5.70781	3.38315
0.342885	0.160827		14.3044	9.07862		0.048235	0.015859		5.65138	3.5128
