# Supplementary material for: Long non-coding RNA Malat1 fine-tunes bone homeostasis and repair by orchestrating cellular crosstalk and β-catenin-OPG/Jagged1 pathway
Source: eLife. 2024 Dec 23;13:RP98900. doi: 10.7554/eLife.98900 (PMC11666238; doi:10.7554/eLife.98900)
Supplement: Figure 4—source data 1. [file elife-98900-fig4-data1.xlsx]

## Sheet: Fig.4a
WT	Malat1-/-
99.6599	98.9796
99.6599	85.3742
100	90.136
100.68	97.9592

## Sheet: Fig.4b
WT	Malat1-/-
90.1965	97.7538
109.305	105.558
100.499	118.403

## Sheet: Fig.4c
Nfatc1
	WT			Malat1-/-
0d	0.87	0.99	1.16	0.69	0.53	0.72
2d	5.62	6.08	6.22	5.25	5.22	6.63
4d	10.95	11.8	12.32	12.16	11.48	12.4
Blimp1
	WT			Malat1-/-
0d	0.94	1.02	1.04	0.45	0.42	0.41
2d	23.75	20.17	18.83	20.29	17.82	18.27
4d	36.55	33.98	33.61	36.9	34.6	28.49
Ctsk
	WT			Malat1-/-
0d	1.17	1.01	0.85	0.6	0.78	0.72
2d	357.1	320.38	335.81	318.18	340.55	367.5
4d	1996.55	1901.08	2071.81	2035.68	2022.58	2191.9
Acp5
	WT			Malat1-/-
0d	1.01	0.85	1.16	0.78	0.68	0.55
2d	1063.92	967.94	990.96	1112.96	1038.25	1038.04
4d	5687.33	5264.25	5330.42	5421.98	5481.33	5242.04
Dcstamp
	WT			Malat1-/-
0d	1.16	1.15	0.75	0.61	0.72	0.73
2d	20.7	21.67	20.2	16.72	17.19	19.84
4d	68.08	82.86	81.46	72.13	77.56	72.31
Atp6v0d2
	WT			Malat1-/-
0d	1	0.95	1.05	0.65	0.66	0.71
2d	29.82	26.66	26.74	25.51	27.33	26.26
4d	101.82	112.56	118.07	99.24	100.22	116.76

## Sheet: Fig.4e
Control	Malat1ΔM/ΔM
0.92	0.13
1.08	0.12
1.01	0.14

## Sheet: Fig.4g
BV/TV			Tb.N			Tb.Th			Tb.Sp			Conn.-Dens			BMD
Contral	Malat1∆M/∆M		Contral	Malat1∆M/∆M		Contral	Malat1∆M/∆M		Contral	Malat1∆M/∆M		Contral	Malat1∆M/∆M		Contral	Malat1∆M/∆M
12.42	14.13		5.2508	5.4629		0.0401	0.0413		0.1846	0.1765		233.459	285.52		113.41	130.61
17.6	13.8		5.375	5.0575		0.0458	0.0434		0.1786	0.1906		323.154	269.609		168.123	129.171
17.49	17.39		5.9169	5.9408		0.0402	0.0413		0.1599	0.1606		356.397	377.355		167.302	164.398
18.6	19.05		5.8224	5.7768		0.0442	0.0423		0.1642	0.1651		372.692	376.979		179.866	181.002
12.28	11.59		5.2003	5.119		0.0373	0.0375		0.1856	0.1882		318.627	290.382		115.976	98.9935
14.01	13.6		5.4714	5.6706		0.0393	0.0391		0.1754	0.1661		339.786	344.308		132.706	130.181
