# Supplementary material for: Long non-coding RNA Malat1 fine-tunes bone homeostasis and repair by orchestrating cellular crosstalk and β-catenin-OPG/Jagged1 pathway
Source: eLife. 2024 Dec 23;13:RP98900. doi: 10.7554/eLife.98900 (PMC11666238; doi:10.7554/eLife.98900)
Supplement: Figure 6—source data 1. [file elife-98900-fig6-data1.xlsx]

## Sheet: Fig.6e
Col2a1			Acan			Sox9
WT	Malat1-/-		WT	Malat1-/-		WT	Malat1-/-
2531.64	2721.3		173.363	148.659		21.0753	18.2109
3186.85	1781.5		136.316	122.986		20.3343	17.4818
2358.37	2164.99		144.31	179.358		18.4527	14.8683
1856.92	1620.98		99.2919	87.1557		10.9087	10.513

## Sheet: Fig.6f
Tnfrs11b			Tnfsf11
WT	Malat1-/-		WT	Malat1-/-
1.71567	1.01248		0.013411	0.02158
2.30496	1.13973		0.015007	0.009676
1.62951	1.23238		0.034017	0.026011
1.71113	0.726628		0.012721	0.010965

## Sheet: Fig.6h
Tcf7			Lef1			Jag1
WT	Malat1-/-		WT	Malat1-/-		WT	Malat1-/-
0.203204	0.064648		1.57269	0.856131		0.209074	0.129551
0.151022	0.092215		2.1322	1.0831		0.23758	0.10577
0.099118	0.133815		1.3403	1.06031		0.137102	0.161609
0.186655	0.052143		1.66152	0.852913		0.208364	0.11553
