# Supplementary material for: Long non-coding RNA Malat1 fine-tunes bone homeostasis and repair by orchestrating cellular crosstalk and β-catenin-OPG/Jagged1 pathway
Source: eLife. 2024 Dec 23;13:RP98900. doi: 10.7554/eLife.98900 (PMC11666238; doi:10.7554/eLife.98900)
Supplement: Figure 8—source data 1. [file elife-98900-fig8-data1.xlsx]

## Sheet: Fig.8c
WT	Malat1-/-
26.99	20.15
27.43	23.69
24.74	21.34
22.49	19.25
25.67	21.5

## Sheet: Fig.8e
Malat1fl/fl	Malat1Δocn
19.77	17.9
20.32	16.41
18.27	15.61
20	18.4
21.52	19.38

## Sheet: Fig.8f
WT	Malat1-/-
18.813	17.26
16.55	15.1
17.88	9.72
20.25	14.56
19.85	12.4
